# Supplementary material
Source: PubMed Central journal article supplement (PMC3591652)
Supplement: supp_M112.021352_mcp.M112.021352-1.pdf [file supp_M112.021352_mcp.M112.021352-1.pdf]

## Supplementary Information

**Figure S1 General assessment of DR effects.**

Weekly body weight changes were measured with a scale in the animal care facility (control: black square; DR: red circle). Low density lipoprotein (LDL) and triglyceride (TG) levels were measured at Inha University hospital (Incheon, Korea).

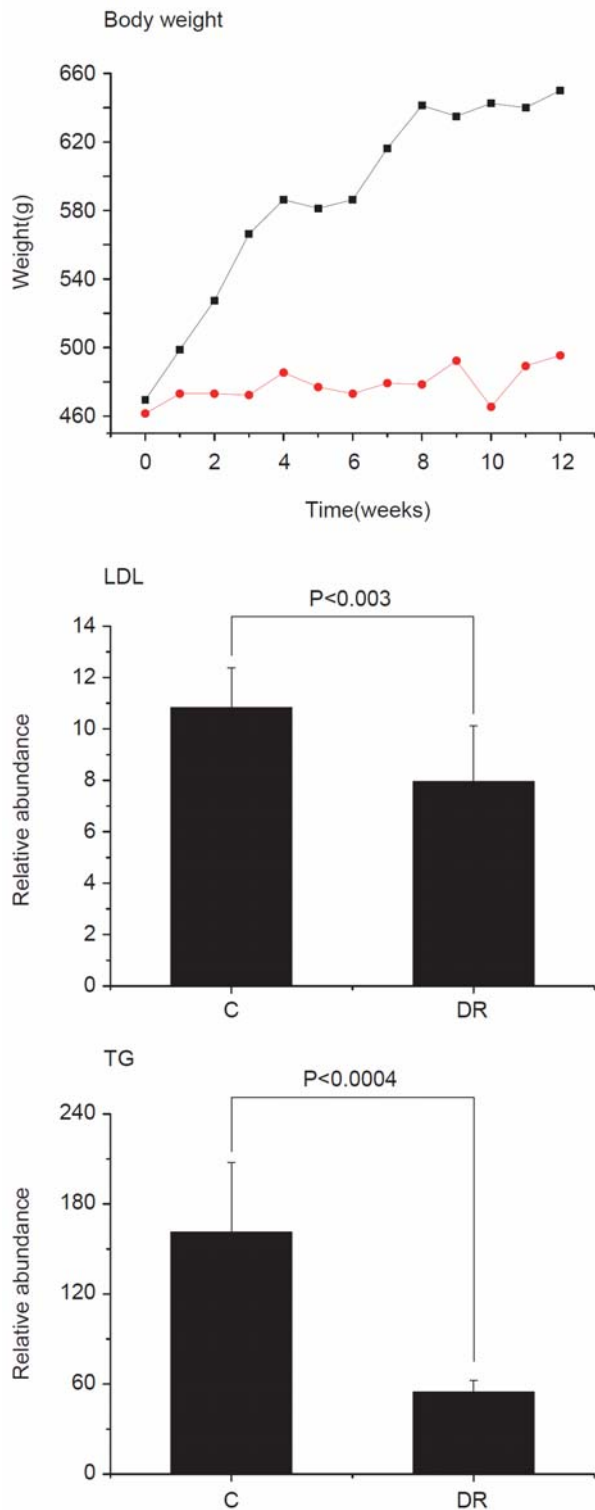

**Figure S2 Levels of the two marker products of phase II detoxification reactions in liver tissues.**

We measured phenylacetylglycine (PAG) and hydroxymethoxyindole glucuronide (HMI-glucuronide) in liver tissues using LC-MS. The levels of the signals identified by the analysis were compared with Student's *t*-test and the resulting p-values are indicated.

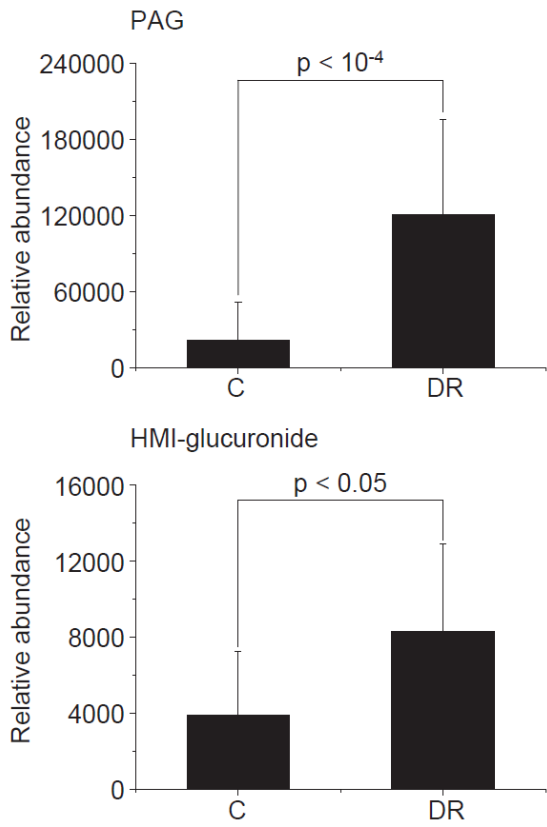

**Supplementary Table S1**

Additional metabolites identified with LC-MS analysis.

|    | Metabolites                | RT(min) | m/z      | MW        | Chemical Formula |
|----|----------------------------|---------|----------|-----------|------------------|
| 1  | 1-Methyladenosine          | 6.17    | 282.19   | 281.11241 | C11H15N5O4       |
| 2  | 1-Methylnicotinamide       | 2.85    | 137.10   | 136.06366 | C7H8N2O          |
| 3  | 7-Methylguanine            | 6.23    | 166.15   | 165.0651  | C6H7N5O          |
| 4  | Betaine                    | 2.90    | 118.14   | 117.07898 | C5H11NO2         |
| 5  | Choline                    | 2.80    | 104.17   | 103.09971 | C5H13NO          |
| 6  | Deoxycytidine              | 4.80    | 228.17   | 227.09060 | C9H13N3O4        |
| 7  | Diethanolamine             | 2.90    | 106.17   | 105.07898 | C4H11NO2         |
| 8  | Homoarginine               | 3.32    | 189.17   | 188.12733 | C7H16N4O2        |
| 9  | Hypoxanthine               | 2.85    | 137.15   | 136.03851 | C5H4N4O          |
| 10 | L-Carnitine                | 2.86    | 162.15   | 161.10519 | C7H15NO3         |
| 11 | L-Citrulline               | 21.12   | 176.14   | 175.09569 | C6H13N3O3        |
| 12 | L-Leucine                  | 6.49    | 132.14   | 131.09463 | C6H13NO2         |
| 13 | L-Methionine               | 5.37    | 150.08   | 149.05105 | C5H11NO2S        |
| 14 | L-Phenylalanine            | 9.65    | 166.16   | 165.07898 | C9H11NO2         |
| 15 | L-Tryptophan               | 6.49    | 205.04   | 204.08988 | C11H12N2O2       |
| 16 | L-Valine                   | 2.90    | 118.11   | 117.07898 | C5H11NO2         |
| 17 | N-Acetylglutamine          | 4.32    | 189.18   | 188.07971 | C7H12N2O4        |
| 18 | N8-Acetylspermidine        | 2.73    | 188.26   | 187.16853 | C9H21N3O         |
| 19 | phenylalanylhydroxyproline | 16.14   | 279.27   | 278.12672 | C14H18N2O4       |
| 20 | Pyroglutamic acid          | 3.93    | 130.0479 | 129.04258 | C5H7NO3          |
| 21 | Riboflavin                 | 15.83   | 377.24   | 376.13827 | C17H20N4O6       |
| 22 | Tyrosine                   | 6.93    | 182.22   | 181.07389 | C9H11NO3         |
| 23 | Tyramine                   | 3.19    | 138.07   | 137.0841  | C8H11NO          |
| 24 | Uric acid                  | 5.50    | 169.09   | 168.02834 | C5H4N4O3         |
| 25 | Xanthurenic acid           | 13.24   | 206.12   | 205.0375  | C10H7NO4         |
